# Supplementary material for: Degradation of Emerging Pollutants by Photocatalysis: Radiation Modeling and Kinetics in Packed-Bed Reactors
Source: MDPI journal article supplement (doi:10.3390/w14223608), 2022-11-09
Supplement: s1 [file s1]

# **Degradation of emerging pollutants by photocatalysis: Radiation modeling and kinetics in packed-bed reactors.**

**Agustina Manassero, Orlando Mario Alfano, María Lucila Satuf\***

Instituto de Desarrollo Tecnológico para la Industria Química (Universidad Nacional del Litoral and Consejo Nacional de Investigaciones Científicas y Técnicas), Ruta Nacional 168, Predio CCT CONICET-Santa Fe, Santa Fe 3000, Argentina.

\* Correspondence: [mlsatuf@santafe-conicet.gov.ar](mailto:mlsatuf@santafe-conicet.gov.ar)

## Evaluation of internal and external mass transfer limitations in the photocatalytic reactors

The assumptions of negligible mass transfer limitations in the cylindrical (CR) and annular (AR) reactors are based on the following calculations:

### Internal mass transfer:

The internal mass transfer resistance was evaluated by means of the Thiele modulus according to the following equation:

$$\phi = t_{TiO_2} \sqrt{\frac{k}{D_e}} \quad (1)$$

where  $t_{TiO_2}$  is the thickness of the film,  $k$  an apparent first order kinetic rate constant and  $D_e$  the effective diffusion coefficient. Considering the information reported in the literature of  $D_e$  for organic compounds in a porous  $TiO_2$  film, a value of  $1.0 \times 10^{-10} \text{ m}^2/\text{s}$  was adopted [1,2].  $k$  was obtained from experimental data and  $H$  was determined from SEM images. The values of  $\phi$  obtained for the different thicknesses of  $TiO_2$  film employed in both reactors are shown in the following table:

| Cylindrical reactor           |                       |                      | Annular reactor               |                       |                       |
|-------------------------------|-----------------------|----------------------|-------------------------------|-----------------------|-----------------------|
| $t_{TiO_2}$ ( $\mu\text{m}$ ) | $k$ (1/s)             | $\phi$               | $t_{TiO_2}$ ( $\mu\text{m}$ ) | $k$ (1/s)             | $\phi$                |
| 0.27                          | $1.44 \times 10^{-5}$ | $1.02 \cdot 10^{-4}$ | 0.27                          | $2.33 \times 10^{-4}$ | $4.12 \times 10^{-4}$ |
| 0.44                          | $1.87 \times 10^{-5}$ | $1.90 \cdot 10^{-4}$ | 3.24                          | $1.86 \times 10^{-4}$ | $8.14 \times 10^{-3}$ |

The low values obtained of the Thiele modulus  $\phi$  ( $\phi \ll 1$ ) support the assumption of negligible internal mass transfer resistance.

### External mass transfer:

External mass transfer resistance can be quantitatively evaluated by comparing the apparent global reaction rate  $\langle r_{CA} \rangle_{V_R}$  and the mass transfer rate as follows [3]:

$$f_e = \frac{\langle r_{AC} \rangle_{V_R} d_p}{k_L C} \quad (2)$$

where  $d_p$  is the characteristic size of the packing material,  $k_L$  is the mass transfer coefficient in the liquid phase and  $C$  is the concentration of the chemical compound in the fluid. If  $f_e < 0.05$ , the external resistance can be considered negligible.

For fixed bed reactors,  $k_L$  can be estimated according to [4]:

$$k_L \left( \frac{\rho}{\mu g} \right)^{1/3} = 0.021 (a d_p)^{-0.49} Re^{0.49} Sc^{-0.50} \quad (3)$$

where  $\rho$  is the density of water,  $\mu$  is the dynamic viscosity of water,  $g$  is the acceleration of gravity,  $a$  is the surface area of the packing material, and  $Re$  and  $Sc$  are the Reynolds and Schmidt numbers, respectively.  $Re$  and  $Sc$  numbers were calculated as:

$$Re = \frac{\rho u_0 d_p}{\mu} \quad (4)$$

$$Sc = \frac{\mu}{\rho D_m} \quad (5)$$

where  $u_0$  is the superficial velocity and  $D_m$  is the molecular diffusion coefficient.

The values of the parameters employed in the calculations are shown in the following table:

| Parameter | Value                                                                            |
|-----------|----------------------------------------------------------------------------------|
| $\rho$    | 1000 kg/m <sup>3</sup>                                                           |
| $u_0$     | 0.013 m/s (CR)- 0.0047 m/s (AR)                                                  |
| $d_p$     | $5 \times 10^{-3}$ m                                                             |
| $\mu$     | $8.9 \times 10^{-4}$ kg/m s                                                      |
| $D_m$     | $1 \times 10^{-9}$ m <sup>2</sup> /s                                             |
| $a$       | 901 m <sup>2</sup> /m <sup>3</sup> (CR) -661 m <sup>2</sup> /m <sup>3</sup> (AR) |

From these calculations, the  $k_L$  obtained was  $5.66 \times 10^{-5}$  m/s for CR and  $4.01 \times 10^{-5}$  m/s for AR.

Finally, the values of  $f_e$  estimated in the CR for 100% of irradiation level were 0.024 and 0.026 for  $t_{TiO_2} = 0.27 \mu\text{m}$  and  $t_{TiO_2} = 0.44 \mu\text{m}$ , respectively. In the AR, under total irradiation, the  $f_e$  estimated were 0.031 and 0.048 for  $t_{TiO_2} = 0.27 \mu\text{m}$  and  $t_{TiO_2} = 3.24 \mu\text{m}$ , respectively.

Thus, as the calculated values of  $f_e$  were always less than 0.05, we can safely assume that external mass transfer limitations are negligible under these experimental conditions.

## References

- [1] Chen, D.; Li, F.; Ray, A. K. External and internal mass transfer effect on photocatalytic degradation. *Catal. Today* **2001**, 66, 475-485.

- [2] Ould-Mame, S. M.; Zahraa, O.; Bouchy, M. Photocatalytic degradation of salicylic acid on fixed TiO<sub>2</sub> -Kinetic studies. *Int. J. Photoenergy* **2000**, 2, 59-66.
- [3] Cloteaux, A.; Gérardin, F.; Thomas, D.; Midoux, N., André, J. C. Fixed bed photocatalytic reactor for formaldehyde degradation: Experimental and modeling study. *Chem. Eng. J.* **2014**, 249, 121-129.
- [4] Onda, K.; Sada, E.; Murase, Y. Liquid-side mass transfer coefficients in packed towers. *AIChE J.* **1959**, 5, 235-239.
